# Supplementary material
Source: PubMed Central journal article supplement (PMC3342629)
Supplement: 12199_2011_224_MOESM1_ESM.pdf [file 12199_2011_224_MOESM1_ESM.pdf]

### Members of the CKDue consortium

| Nation           | Collaborative Institutes                                                                                                  | Members                                                                                              |
|------------------|---------------------------------------------------------------------------------------------------------------------------|------------------------------------------------------------------------------------------------------|
| <b>Sri Lanka</b> | Faculty of Science, University of Peradeniya                                                                              | Rohana Chandrajith (CP)<br>Ayanthi Navarathna                                                        |
|                  | Faculty of Medicine, University of Peradeniya                                                                             | N. Ratnatunga<br>Dhammika Dissanayake<br>Nimmi Aturaliya<br>K. Jayasekara                            |
|                  | Ministry of Health and Nutrition [GH Kandy (Teaching), District Hospital Medawachchiya, District Hospital Girandurukotte] | Tilak Abeysekara<br>A.W.M. Wazeel<br>Upul Karunaratne<br>KU Senaviratne<br>EDL Gunaratne             |
|                  | Institute of Fundamental Studies (IFS)                                                                                    | C.B. Dissanayake<br>J.P. Padmasiri                                                                   |
|                  | Emeritus professor                                                                                                        | C.M. Madduma Bandara                                                                                 |
| <b>Japan</b>     | Department of Health and Environmental Sciences, Kyoto University                                                         | Akio Koizumi (PI)<br>Kouji Harada<br>Toshiaki Hitomi<br>Shanika Nanayakkara<br>Lalantha Senevirathna |
|                  | Kitano Hospital                                                                                                           | Eri Muso<br>Toshiyuki Komiya<br>Yoshiaki Yuba                                                        |
|                  | Tohoku Bunkyo University                                                                                                  | Takao Watanabe                                                                                       |
|                  | Daiichi Pharmaceutical University                                                                                         | Koichi Haraguchi                                                                                     |
| <b>Australia</b> | University of Queensland                                                                                                  | Wendy Hoy<br>Glenda Gobe<br>Susan Mott                                                               |
